# Supplementary material for: Doping and transformation mechanisms of Fe3+ions in Fe-doped TiO2
Source: Royal Society of Chemistry journal article supplement (doi:10.1039/c6ce02523d), 2017-01-01
Supplement: c6ce02523d1.pdf [file c6ce02523d1.pdf]

## Supporting information for

### **Doping and transformation mechanisms of Fe<sup>3+</sup> ions in Fe-doped TiO<sub>2</sub>**

Yajun Yang<sup>a</sup>, Yanlong Yu<sup>b</sup>, Jingsheng Wang<sup>a</sup>, Wenjun Zheng<sup>b</sup> and Yaan Cao<sup>a\*</sup>

<sup>a</sup>Key laboratory of Weak-Light Nonlinear Photonics, Ministry of Education, TEDA Applied Physics Institute and School of Physics, Nankai University, Tianjin 300457, China.

<sup>b</sup>Department of Materials Chemistry, College of Chemistry, Nankai University, Tianjin 300071, China

#### **Piezoelectric catalytic experiments**

The ultrasonic piezoelectric catalytic experiments of all the samples were carried out in a 250 mL quartz tube reactor with 100 mg of catalysts tiled on a glass sheet (1 cm × 2.5 cm). The reactor was injected with 0.5 ml distilled water. Then the reactor was continuously flushed with CO<sub>2</sub> (99.999%) at a flux of 15 mL min<sup>-1</sup> for at least 40 min, ensuring the reactor was full of CO<sub>2</sub>. Next, the catalyst was subjected to an ultrasonic process. The temperature in the reactor is around 30°C during the whole process. The produced CH<sub>4</sub> and CO were measured using a gas chromatograph (GC-2010, Shimadzu Co., Japan). The blank experiment was performed without the catalyst under otherwise identical conditions. All the samples exhibited almost no activity in CO<sub>2</sub> reduction without ultrasonic wave.

Refined crystalline sizes,  $d$  (hkl) values, cell parameters, and cell volumes with the Rietveld method for a part of pure and doped samples are shown in Table S1–S3.

Table S1: Crystalline sizes,  $d$  (hkl) values, cell parameters, and cell volumes of the samples

| Sample   | Cell parameters (Å) |       | Cell volume(Å <sup>3</sup> ) | Crystal size (nm) | $d_{(hkl)}$ value (Å) |
|----------|---------------------|-------|------------------------------|-------------------|-----------------------|
|          | a=b                 | c     |                              |                   |                       |
| P-300    | 3.790               | 9.509 | 136.59                       | 6.9               | $d(101)=3.524$        |
| D-300-30 | 3.776               | 9.486 | 135.25                       | 3.0               | $d(101)=3.501$        |
| P-500    | 3.785               | 9.516 | 136.33                       | 17.2              | $d(101)=3.520$        |
| D-500-30 | 3.776               | 9.465 | 134.98                       | 7.5               | $d(101)=3.507$        |
| P-800    | 4.595               | 2.961 | 62.52                        | 58.8              | $d(110)=3.251$        |
| D-800-30 | 4.590               | 2.958 | 62.33                        | 55.5              | $d(110)=3.244$        |

Table S2: Crystalline Sizes,  $d$  (hkl) values, cell parameters, and cell volumes for P-500 and D-500-x (x = 5, 10, 20 and 30) samples

| sample   | cell parameters (Å)<br>(anatase) | Cell volume (Å <sup>3</sup> ) | Crystal size (nm) | $d_{(hkl)}$ value (Å) |
|----------|----------------------------------|-------------------------------|-------------------|-----------------------|
| P-500    | a=b=3.785, c=9.516               | 136.33                        | 17.2              | $d(101)=3.520$        |
| D-500-5  | a=b=3.782, c=9.483               | 135.64                        | 7.6               | $d(101)=3.518$        |
| D-500-10 | a=b=3.782, c=9.471               | 135.49                        | 7.3               | $d(101)=3.506$        |

|          |                    |        |     |              |
|----------|--------------------|--------|-----|--------------|
| D-500-20 | a=b=3.783, c=9.445 | 135.16 | 7.0 | d(101)=3.501 |
| D-500-30 | a=b=3.776, c=9.465 | 134.98 | 6.5 | d(101)=3.487 |

Table S3: Crystalline Sizes,  $d$  (hkl) values, cell parameters, and cell volumes for P-800 and D-800-x (x = 5, 10, 20 and 30) samples

| sample   | Cell parameters (Å)<br>(rutile) | Cell<br>volume(Å <sup>3</sup> ) | Crystal<br>size (nm) | $d_{(hkl)}$ value (Å) |
|----------|---------------------------------|---------------------------------|----------------------|-----------------------|
| P-800    | a=b=4.595, c=2.961              | 62.52                           | 58.8                 | d(110)=3.251          |
| D-800-5  | a=b=4.591, c= 2.958             | 62.35                           | 57.1                 | d(110)=3.245          |
| D-800-10 | a=b=4. 591, c= 2.958            | 62.35                           | 52.4                 | d(110)=3.244          |
| D-800-20 | a=b=4.591, c= 2.957             | 62.33                           | 50.9                 | d(110)=3.244          |
| D-800-30 | a=b=4.591, c= 2.956             | 62.30                           | 49.5                 | d(110)=3.242          |

Table S4: Ti/Fe ratio of the materials determined by EDX

| Sample   | Ti/Fe ratio |
|----------|-------------|
| D-500-5  | 19.013      |
| D-500-10 | 9.010       |
| D-500-20 | 3.247       |
| D-500-30 | 2.239       |
| D-500-40 | 1.372       |
| D-800-5  | 18.514      |
| D-800-10 | 8.763       |
| D-800-20 | 3.178       |
| D-800-30 | 2.145       |

Table S5: Atomic percentage of the elements in the surface of the samples determined by XPS data

| Sample   | Fe 2p | Ti 2p | O 1s |
|----------|-------|-------|------|
| D-500-5  | 2.2   | 26.6  | 71.2 |
| D-500-10 | 4.0   | 24.3  | 71.7 |
| D-500-20 | 4.7   | 21.7  | 73.5 |
| D-500-30 | 7.0   | 22.2  | 70.8 |
| D-500-40 | 9.9   | 17.4  | 72.7 |
| D-800-5  | 6.6   | 21.0  | 72.4 |
| D-800-10 | 8.9   | 17.2  | 74.6 |
| D-800-20 | 9.5   | 15.3  | 75.2 |
| D-800-30 | 11.3  | 15.3  | 73.4 |

Table S6. The BET surface area values of the samples.

| Sample   | $S_{\text{BET}}$ ( $\text{m}^2/\text{g}$ ) |
|----------|--------------------------------------------|
| P-500    | 80                                         |
| D-500-5  | 33                                         |
| D-500-10 | 81                                         |
| D-500-20 | 30                                         |
| D-500-30 | 15                                         |
| D-500-40 | 80                                         |
| P-800    | 2.2                                        |
| D-800-5  | 3.5                                        |
| D-800-10 | 3.5                                        |
| D-800-20 | 2.7                                        |
| D-800-30 | 2.9                                        |

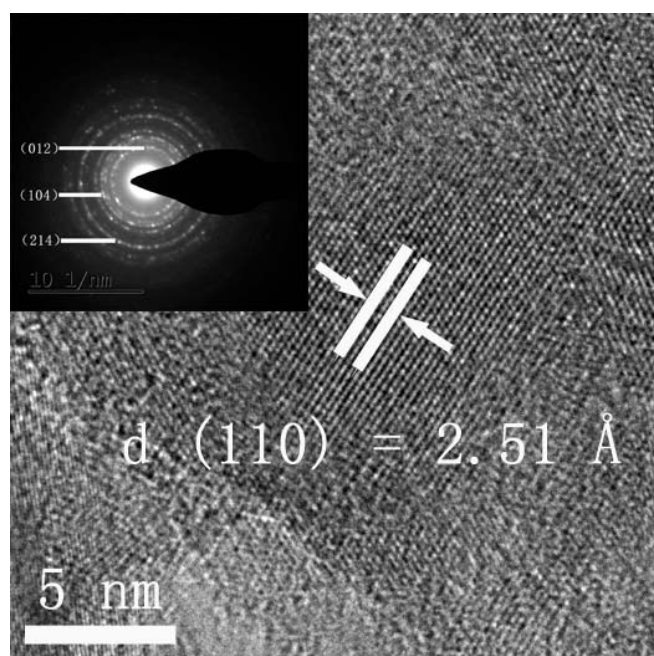

Fig. S1. HRTEM image of D-500-40. The inset shows the corresponding selected area electron diffraction pattern, confirming crystalline  $\alpha\text{-Fe}_2\text{O}_3$  structure.

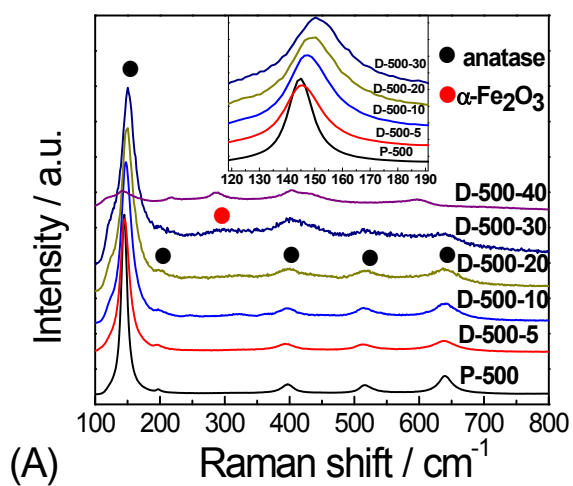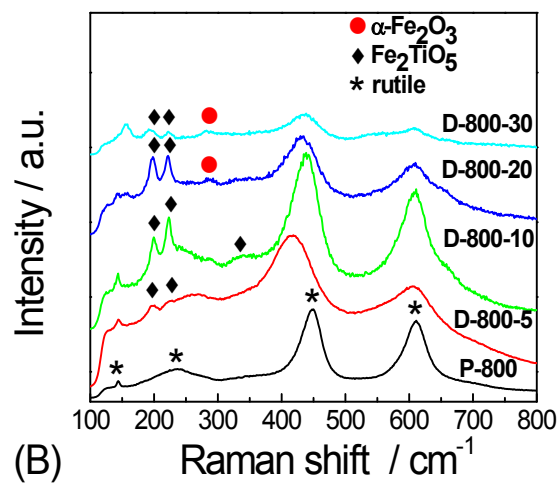

Fig. S2. Raman spectra of (A) P-500 and D-500- $x$  ( $x = 5, 10, 20, 30, 40$ ) and (B) P-800 and D-800- $x$  ( $x = 5, 10, 20, 30$ ) samples.

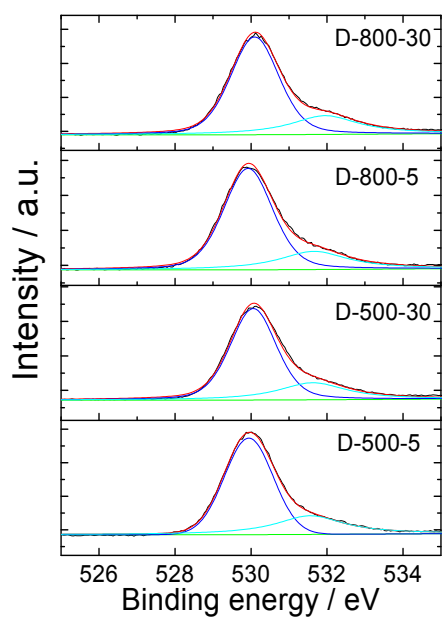

Fig. S3. XPS spectra of O1s of D-500-5, D-500-30, D-800-5 and D-800-30.

The XPS spectra of O1s of D-500-5, D-500-30, D-800-5 and D-800-30 were fitted with the nonlinear least-squares fit program using Gauss-Lorentzian peak shapes, and two O1s peaks appear after deconvolution, which are attributed to lattice oxygen (about 530.0 eV) and surface hydroxyl oxygen (about 531.9 eV).<sup>1</sup>

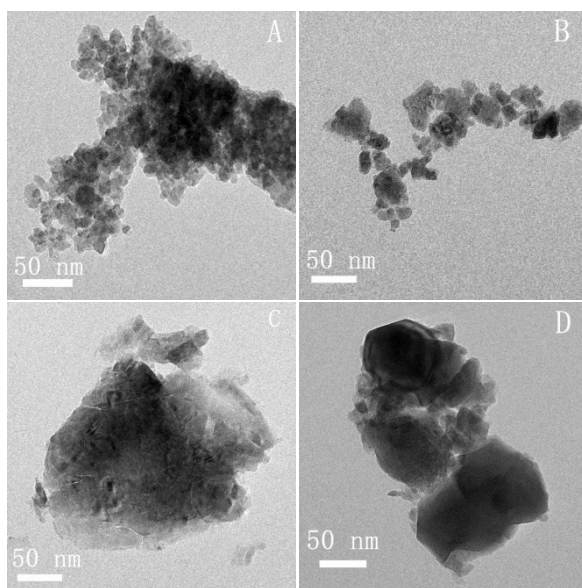

Fig. S4. TEM images of D-500-10 (A), D-500-30 (B), D-800-5 (C) and D-800-30

(D) samples.

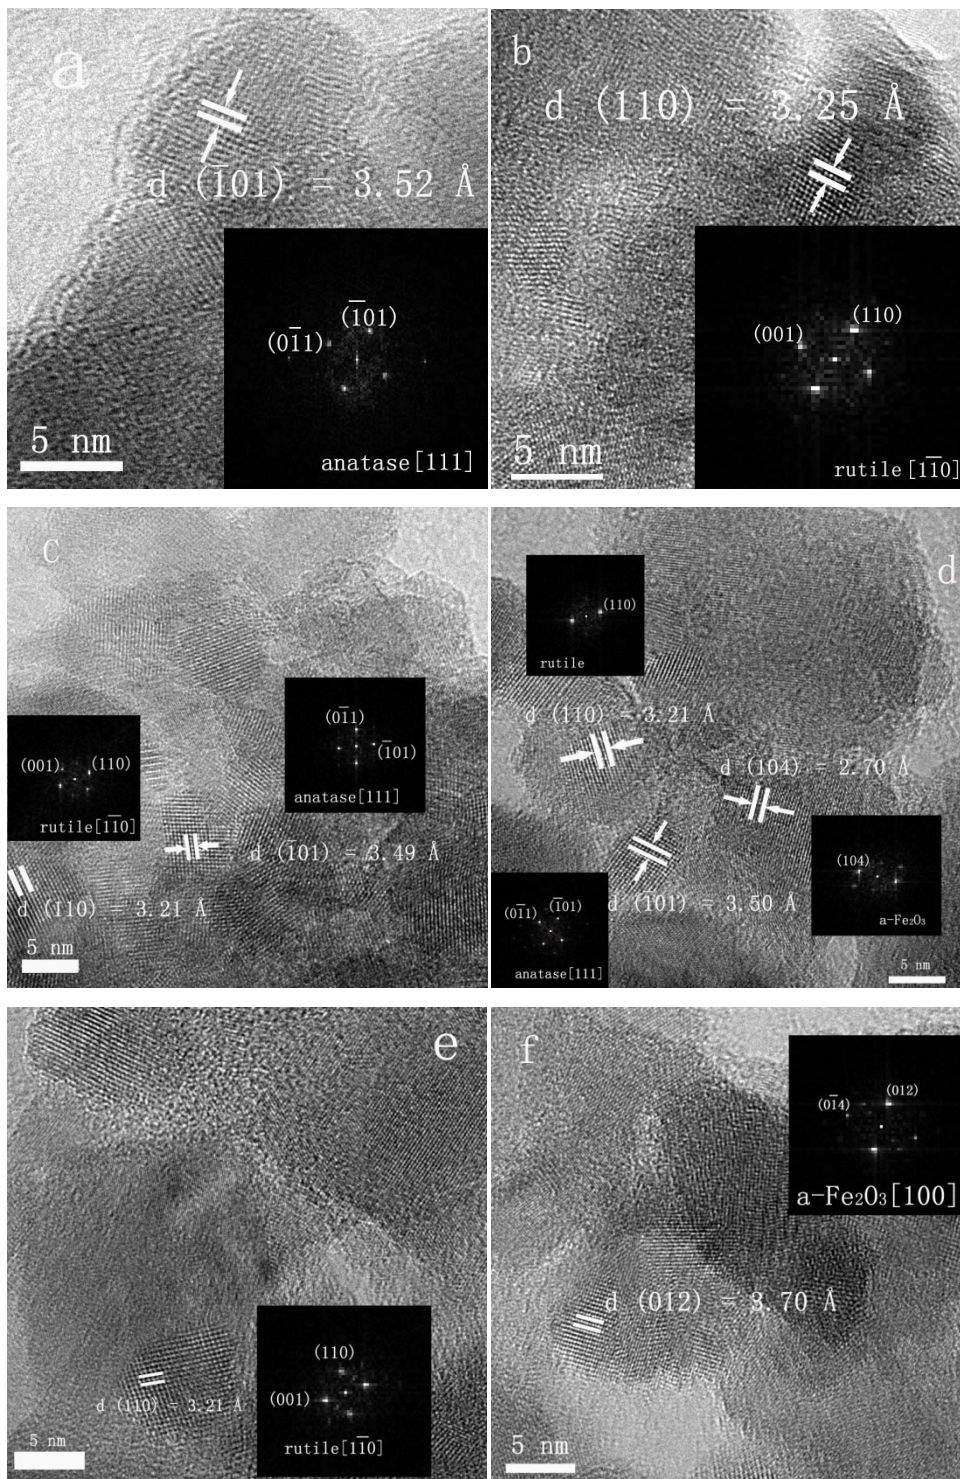



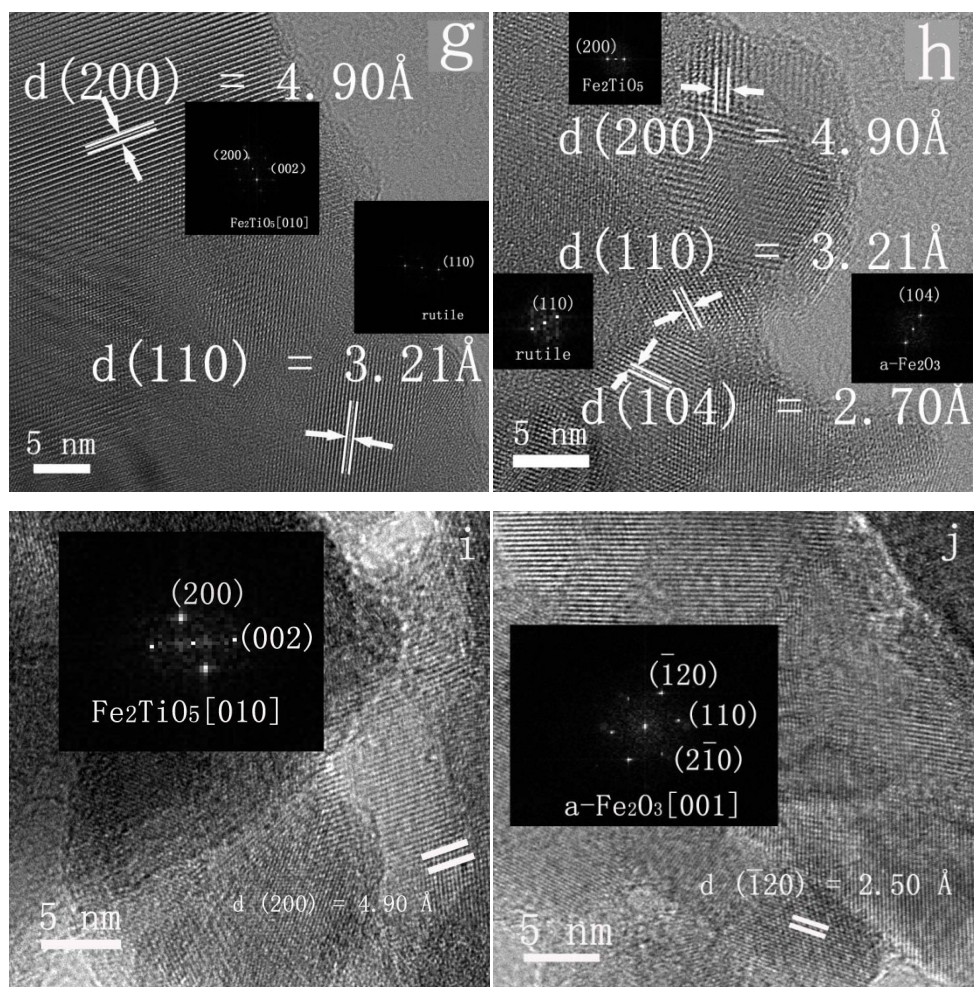

Fig. S5. HRTEM images and FFT transformation patterns (inset) of P-500 (a), P-800 (b), D-500-10 (c), D-500-30 (d, e, f), D-800-5 (g), and D-800-30 (h, i, j) samples.

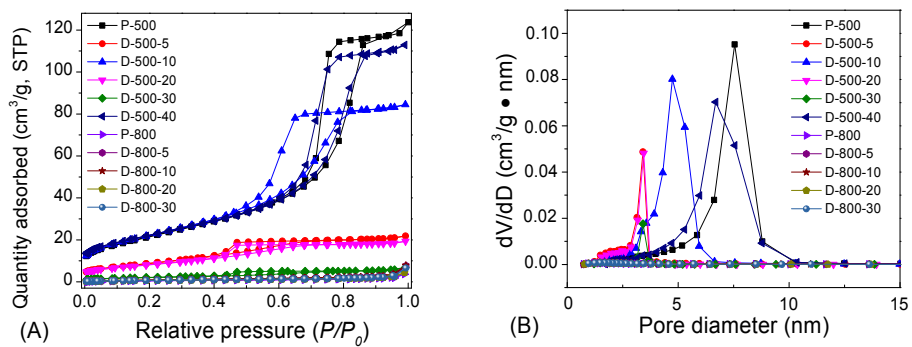

Fig. S6. N<sub>2</sub> adsorption–desorption isotherms (A) and pore size distributions (B) of P-500, D-500-5, D-500-10, D-500-20, D-500-30, D-500-40, P-800, D-800-5, D-800-10, D-800-20 and D-800-30 samples.

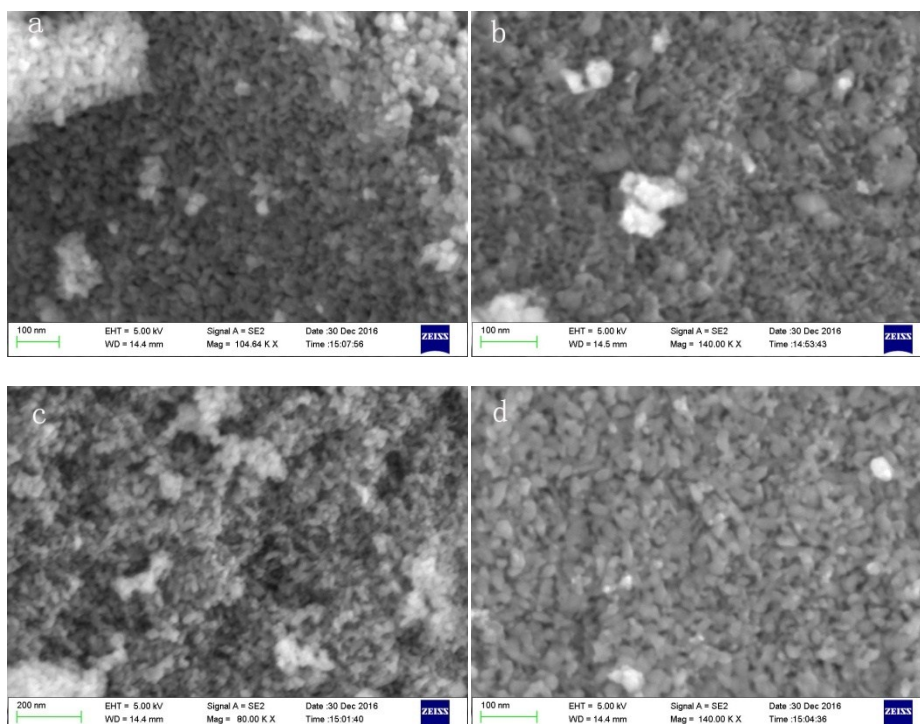

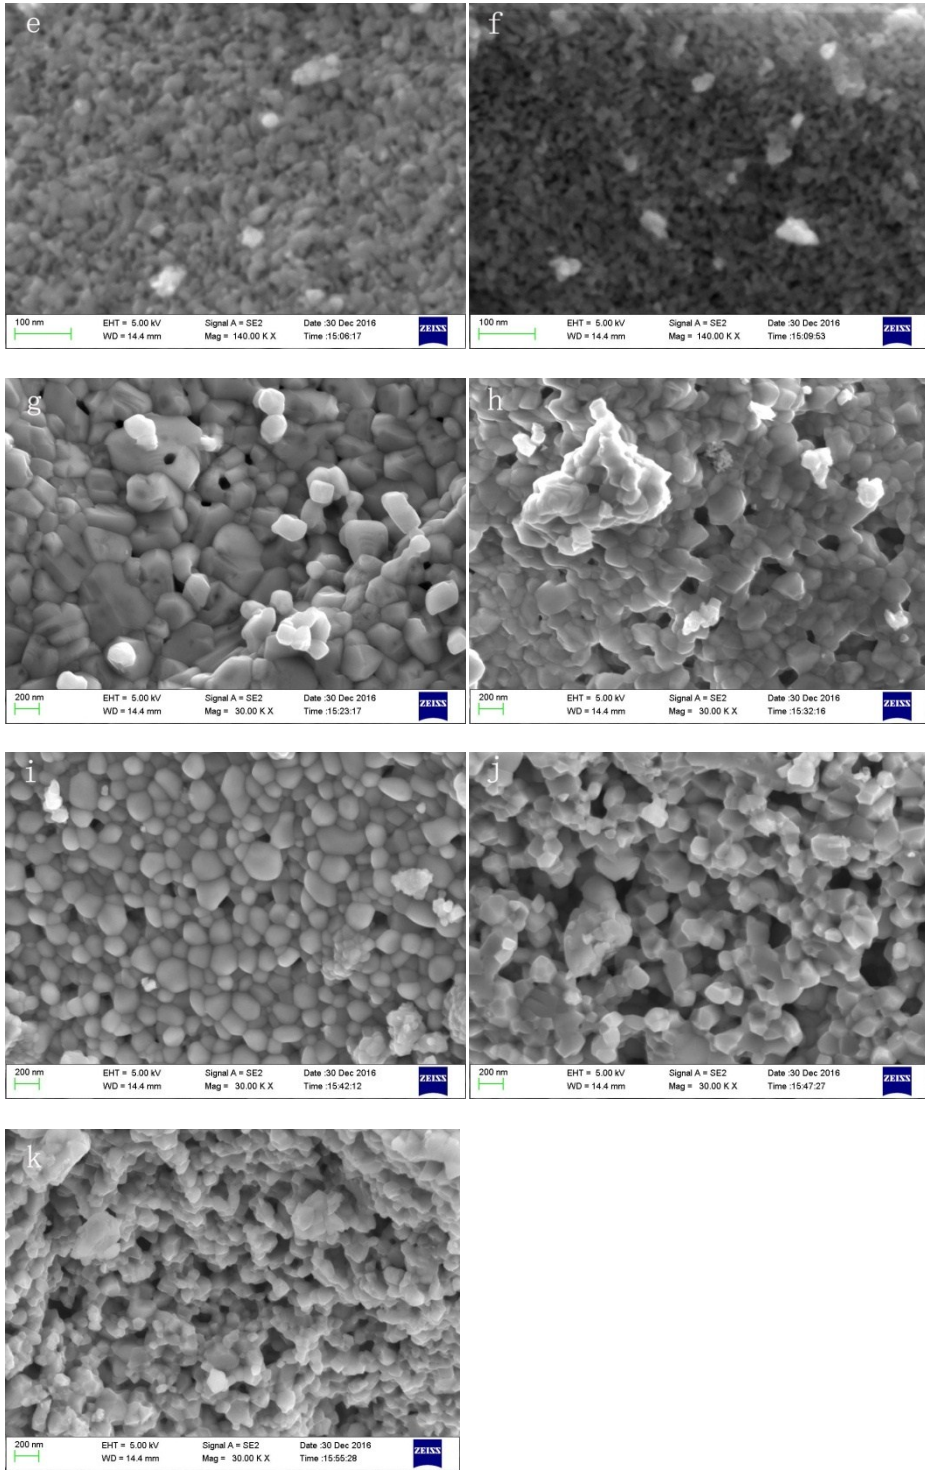

Fig. S7. SEM images of P-500 (a), D-500-5 (b), D-500-10 (c), D-500-20 (d), D-500-30 (e), D-500-40 (f), P-800 (g), D-800-5 (h), D-800-10 (i), D-800-20 (j) and D-800-30 (k) samples.

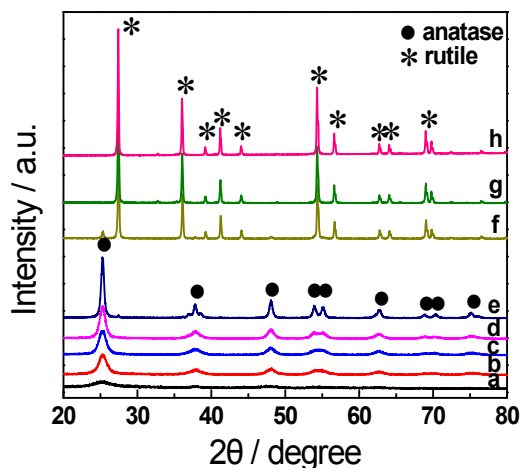

Fig. S8. X-ray diffraction patterns of pure  $\text{TiO}_2$  samples annealed at different temperatures:  $100^\circ\text{C}$  (a),  $200^\circ\text{C}$  (b),  $300^\circ\text{C}$  (c)  $400^\circ\text{C}$  (d),  $500^\circ\text{C}$  (e),  $600^\circ\text{C}$  (f),  $700^\circ\text{C}$  (g),  $800^\circ\text{C}$  (h).

Fig. S8 shows the X-ray diffraction spectra of pure  $\text{TiO}_2$  annealed at different temperatures ( $100^\circ\text{C} - 800^\circ\text{C}$ ). It can be observed that P-100 exhibits an amorphous structure and P- $T$  ( $200 \leq T \leq 500$ ) samples exhibit an anatase structure. Besides the anatase peaks, the diffraction peaks ascribed to rutile are observed in P-600, implying the formation of rutile occurs. While the peaks intensities for anatase decrease in P-600, indicating the phase transition from anatase to rutile occurs at  $600^\circ\text{C}$  for pure  $\text{TiO}_2$  samples. When the annealing temperature is above  $700^\circ\text{C}$ , the peaks of anatase disappear, suggesting anatase is completely transformed into rutile.

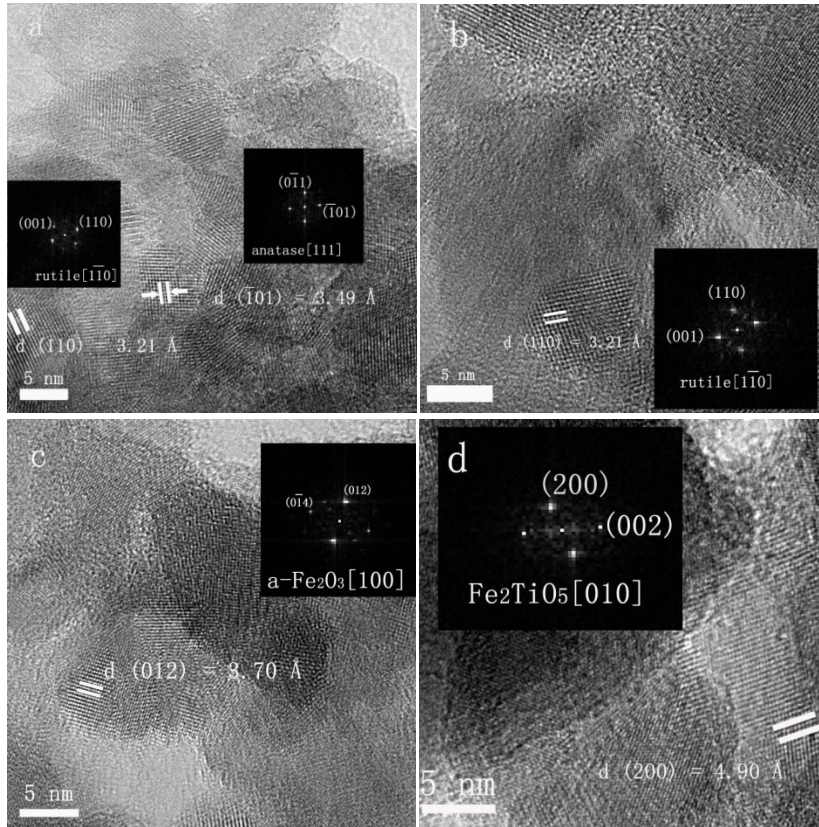

Fig. S9. HRTEM images and FFT transformation patterns (inset) of D-500-10 (a), D-500-30 (b, c), D-800-30 (d).

The phase transformations of iron oxide and titania were confirmed by HRTEM. Lattice fringes with distances at 3.21 Å were observed for D-500-10 and D-500-30, corresponding to (110) facets of rutile. This indicates the doping of Fe can promote the anatase-rutile phase transformations. For D-500-30, lattice fringes with the distance at 3.70 Å were also observed, corresponding to (012) facets of  $\alpha$ -Fe<sub>2</sub>O<sub>3</sub>. This implies that for highly doped samples annealed at 500 °C, the redundant Fe<sup>3+</sup> ions will form  $\alpha$ -Fe<sub>2</sub>O<sub>3</sub>. Clear lattice fringes with the distances at 4.90 Å were observed for D-

800-30, corresponding to (200) facets of  $\text{Fe}_2\text{TiO}_5$ , indicating  $\text{Fe}_2\text{O}_3$  would react with  $\text{TiO}_2$  to give  $\text{Fe}_2\text{TiO}_5$  for highly doped samples annealed at  $800^\circ\text{C}$ .

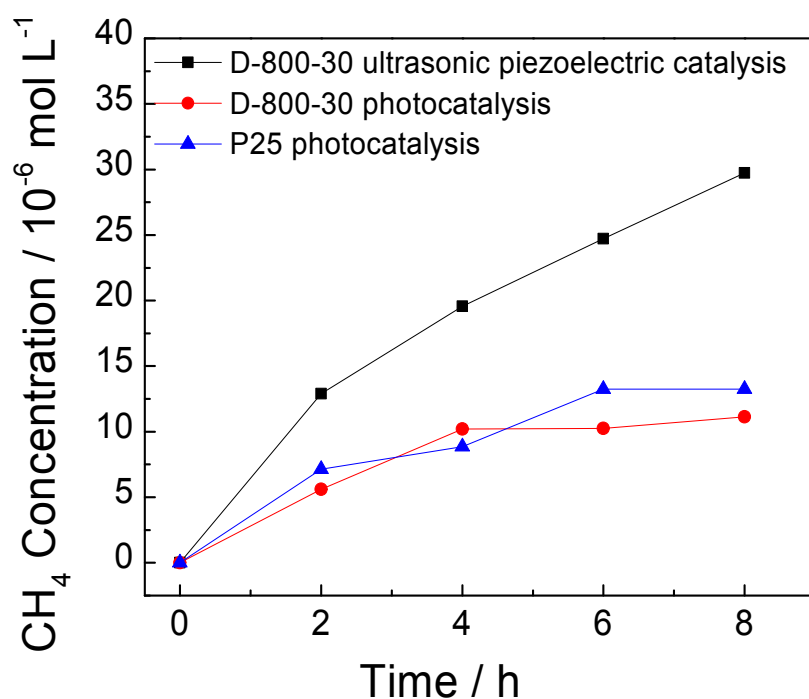

Fig. S10.  $\text{CH}_4$  generation over D-800-30 under ultrasonic wave or ultraviolet irradiation and the ultraviolet photocatalytic activity of P25 for comparison.

## References

- 1 E. L. Bullock, L. Patthey and S. G. Steinemann, *Surf. Sci.*, 1996, **352**, 504-510.
